# Supplementary material for: Selective and controllable purification of monomeric lignin model compounds via aqueous phase reforming
Source: Royal Society of Chemistry journal article supplement (doi:10.1039/c5gc00410a), 2015-01-01
Supplement: c5gc00410a1.pdf [file c5gc00410a1.pdf]

## Supporting Information

### Selective and Controllable Purification of Monomeric Lignin Model Compounds via Aqueous Phase Reforming

Malte Otromke, Lara Theiss, Anna Wunsch, Alexander Susdorf, and Thomas Aicher

Fraunhofer Institute for Solar Energy Systems ISE, Division Energy Technology, HeidenhofsraÙe 2, 79110 Freiburg, Germany

#### Contents

|          |                                                        |             |
|----------|--------------------------------------------------------|-------------|
| <b>1</b> | <b>Determination of MeOH Amounts</b>                   | <b>S.2</b>  |
| <b>2</b> | <b>Reaction Network</b>                                | <b>S.2</b>  |
| 2.1      | Reaction Progressions . . . . .                        | S.2         |
| 2.2      | Monitored Compounds . . . . .                          | S.3         |
| 2.3      | Reaction Network . . . . .                             | S.5         |
| 2.3.1    | Specific Reactions . . . . .                           | S.5         |
| 2.4      | Coking Parameters . . . . .                            | S.6         |
| 2.5      | Reaction Rates . . . . .                               | S.7         |
| 2.6      | Set of Differential Equations for the Guaiacol-Network | S.7         |
| 2.7      | Reaction Network (Structural Formula) . . . . .        | S.8         |
| <b>3</b> | <b>Catalyst Analysis</b>                               | <b>S.10</b> |
| 3.1      | XRD . . . . .                                          | S.10        |
| 3.2      | SEM Pictures . . . . .                                 | S.10        |

## 1 Determination of MeOH Amounts

$$m_{\text{MeOH}} = \frac{n_{\text{MeO}}}{3} \frac{M_{\text{MeOH}}}{M_{\text{Aromatic}}} m_{\text{Aromatic}}$$

$$m_{\text{MeOH}} = n_{\text{MeOH}} M_{\text{MeOH}}$$

$$n_{\text{MeOH}} = \frac{1}{3} n_{\text{Guaiacol}}$$

$$n_{\text{Guaiacol}} = \frac{m_{\text{Guaiacol}}}{M_{\text{Guaiacol}}}$$

## 2 Reaction Network

### 2.1 Reaction Progressions

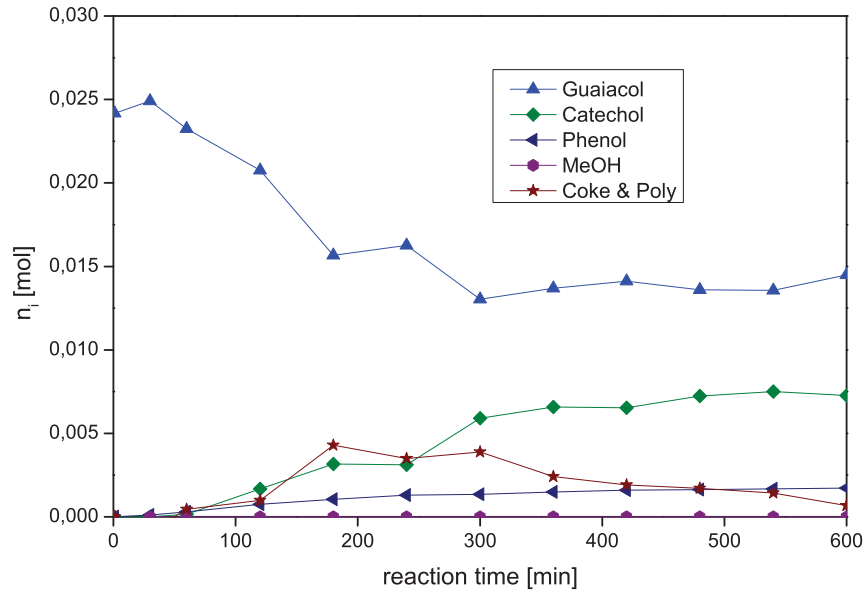

Figure S.1: Compounds' amounts of the reaction guaiacol in water at 245 °C with Pt/ $\gamma$ -Al<sub>2</sub>O<sub>3</sub>

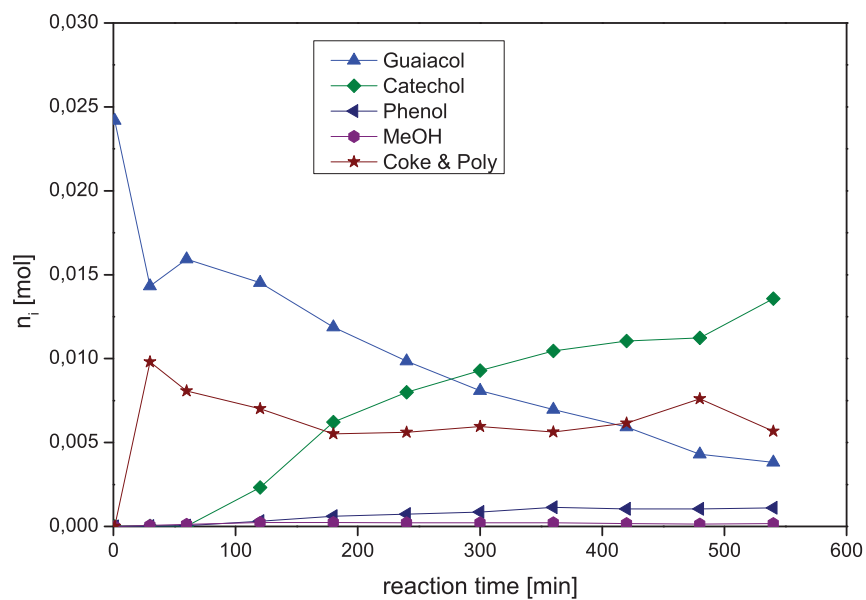

Figure S.2: Compounds' amounts of the reaction guaiacol in water at 245 °C with Pt/C

## 2.2 Monitored Compounds

- 1 Syringol
- 2 1,2-Benzenediol,3-Methoxy (1,2-BD,3-MeO) (+ isomers)
- 3 1,2,3-Trihydroxybenzene (1,2,3-THB) (+ isomers)
- 4 Guaiacol
- 5 Catechol
- 6 Phenol
- 7 H<sub>2</sub>
- 8 CH<sub>4</sub>
- 9 CO<sub>2</sub>
- 10 Coke & Poly
- 11 Methanol

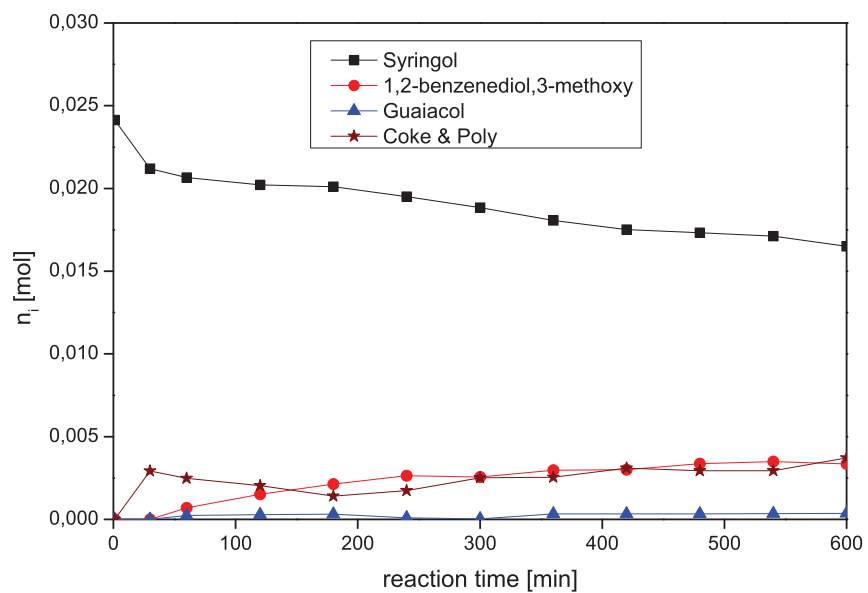

Figure S.3: Compounds' amounts of the reaction syringol in water at 245 °C with Pt/ZrO<sub>2</sub>

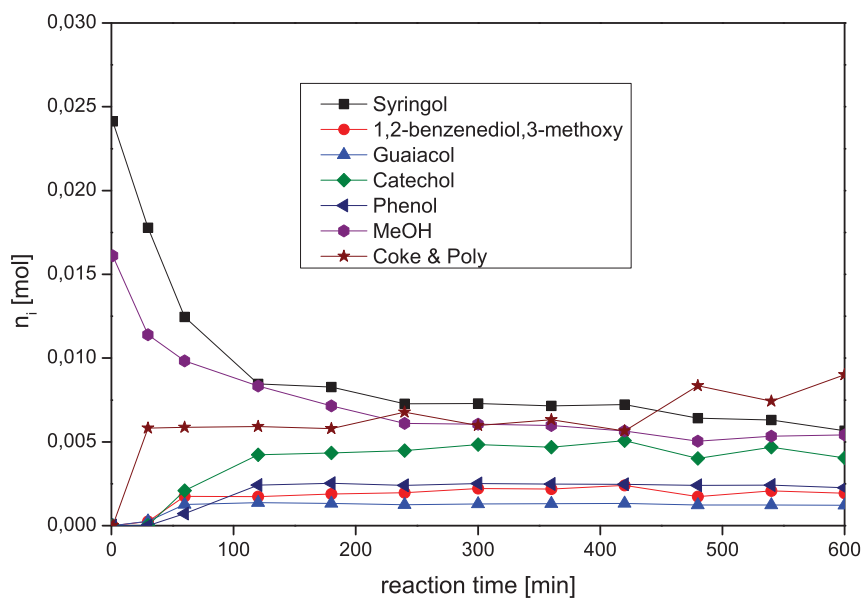

Figure S.4: Compounds' amounts of the reaction syringol and MeOH in water at 245 °C with Pt/ZrO<sub>2</sub>

## 2.3 Reaction Network

### 2.3.1 Specific Reactions

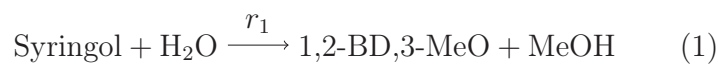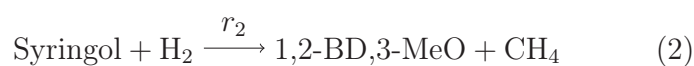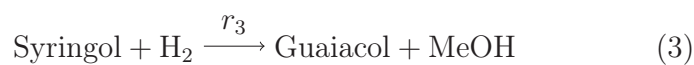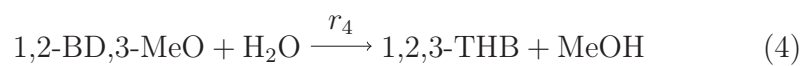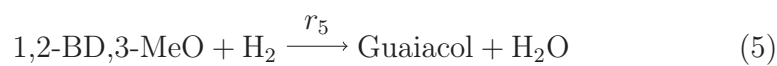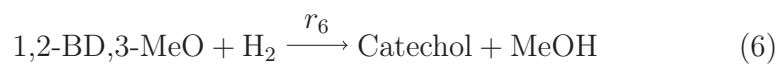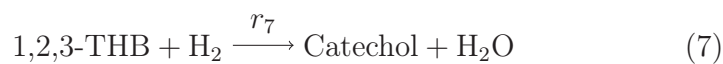

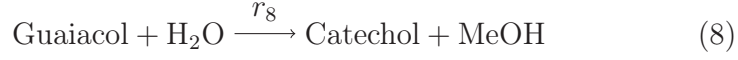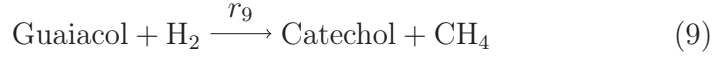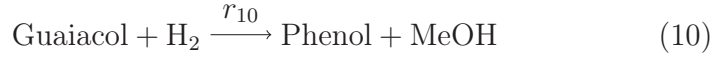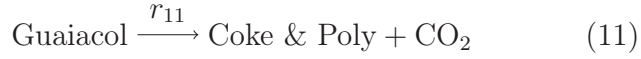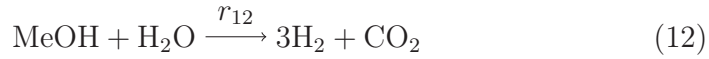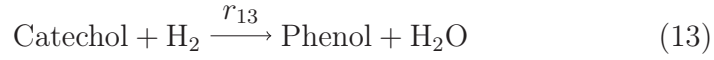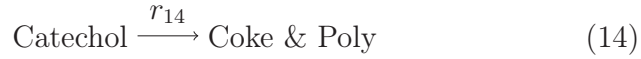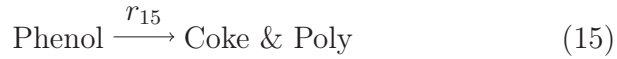

## 2.4 Coking Parameters

$$\mathbf{k}_{\text{eff.}} = \mathbf{k}a \quad (16)$$

$$a = \left( 1 - \frac{n_{\text{Coke \& Poly}}}{n_{\text{Coke \& Poly, max}}} \right) \quad (17)$$

Where  $\mathbf{k}$  is the vector of all reaction rates. The value of  $n_{\text{Coke \& Poly, max}}$  is determined by taking the arithmetic average of the measured values of Coke & Poly when the distribution of the compounds did not change in any significant way.

## 2.5 Reaction Rates

$$\begin{aligned}
 r_1 &= k_1 n_{\text{Syringol}} \\
 r_2 &= k_2 n_{\text{Syringol}} n_{\text{H}_2} \\
 r_3 &= k_3 n_{\text{Syringol}} n_{\text{H}_2} \\
 r_4 &= k_4 n_{1,2\text{-BD},3\text{-MeO}} \\
 r_5 &= k_5 n_{1,2\text{-BD},3\text{-MeO}} n_{\text{H}_2} \\
 r_6 &= k_6 n_{1,2\text{-BD},3\text{-MeO}} n_{\text{H}_2} \\
 r_7 &= k_7 n_{1,2,3\text{-THB}} \\
 r_8 &= k_8 n_{\text{Guaiacol}} \\
 r_9 &= k_9 n_{\text{Guaiacol}} n_{\text{H}_2} \\
 r_{10} &= k_{10} n_{\text{Guaiacol}} n_{\text{H}_2} \\
 r_{11} &= k_{11} n_{\text{Guaiacol}} \\
 r_{12} &= k_{12} n_{\text{MeOH}} \\
 r_{13} &= k_{13} n_{\text{Catechol}} n_{\text{H}_2} \\
 r_{14} &= k_{14} n_{\text{Catechol}} \\
 r_{15} &= k_{15} n_{\text{Phenol}}
 \end{aligned}$$

## 2.6 Set of Differential Equations for the Guaiacol-Network

$$\frac{d}{dt} n_{\text{Guaiacol}} = -r_8 - r_9 - r_{10} - r_{11} \quad (18)$$

$$\frac{d}{dt} n_{\text{Catechol}} = r_8 + r_9 - r_{13} - r_{14} \quad (19)$$

$$\frac{d}{dt} n_{\text{Phenol}} = r_{10} + r_{14} - r_{15} \quad (20)$$

$$\frac{d}{dt} n_{\text{MeOH}} = r_8 + r_{10} - r_{12} \quad (21)$$

$$\frac{d}{dt} n_{\text{H}_2} = 3 r_{12} - r_9 - r_{10} - r_{13} \quad (22)$$

$$\frac{d}{dt} n_{\text{CH}_4} = r_9 \quad (23)$$

$$\frac{d}{dt} n_{\text{CO}_2} = r_{11} + r_{12} \quad (24)$$

$$\frac{d}{dt} n_{\text{Coke \& Poly}} = r_{11} + r_{14} + r_{15} \quad (25)$$

## 2.7 Reaction Network (Structural Formula)



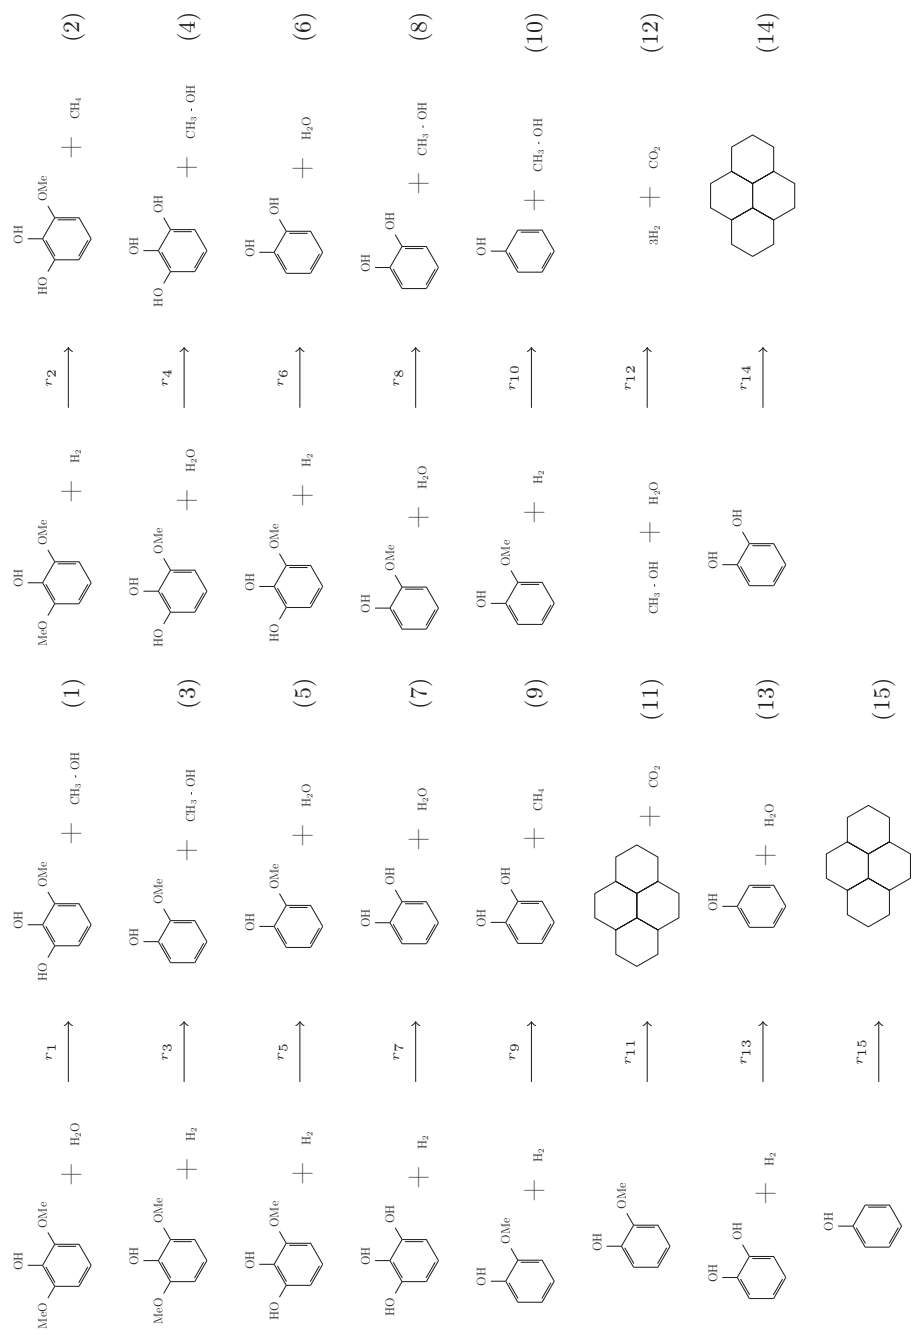

Figure S.5: Reaction network of syringol under hydrothermal conditions at 245 °C and usage of a supported Pt-catalyst.

### 3 Catalyst Analysis

#### 3.1 XRD

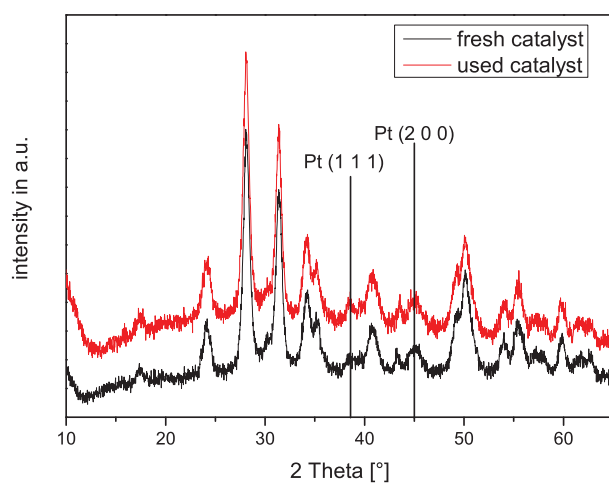

Figure S.6: XRD of the fresh and the used Pt/ZrO<sub>2</sub> catalyst. The catalyst has been used for 10 h under 245 °C in liquid water. The zirconia peaks between  $2\Theta = 10^\circ - 65^\circ$  show no changes. The Pt (1 1 1) and (2 0 0) peaks on zirconia are indicated.

#### 3.2 SEM Pictures

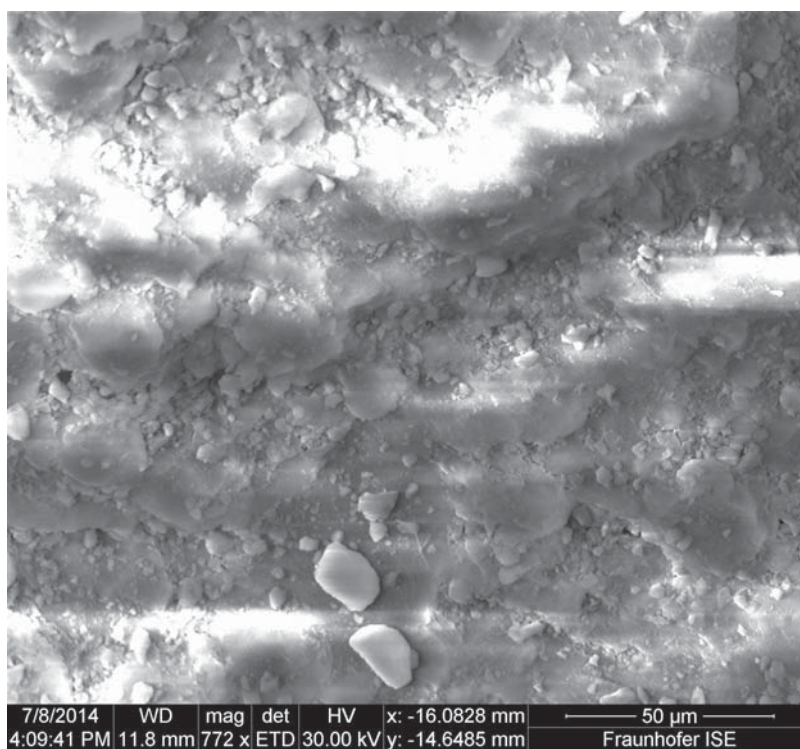

Figure S.7: SEM picture of the fresh  $\gamma$ - $\text{Al}_2\text{O}_3$  catalyst. A fractured surface with larger coherent areas. The brighter parts of the picture appear due to charges accumulating on the non-conductive material.

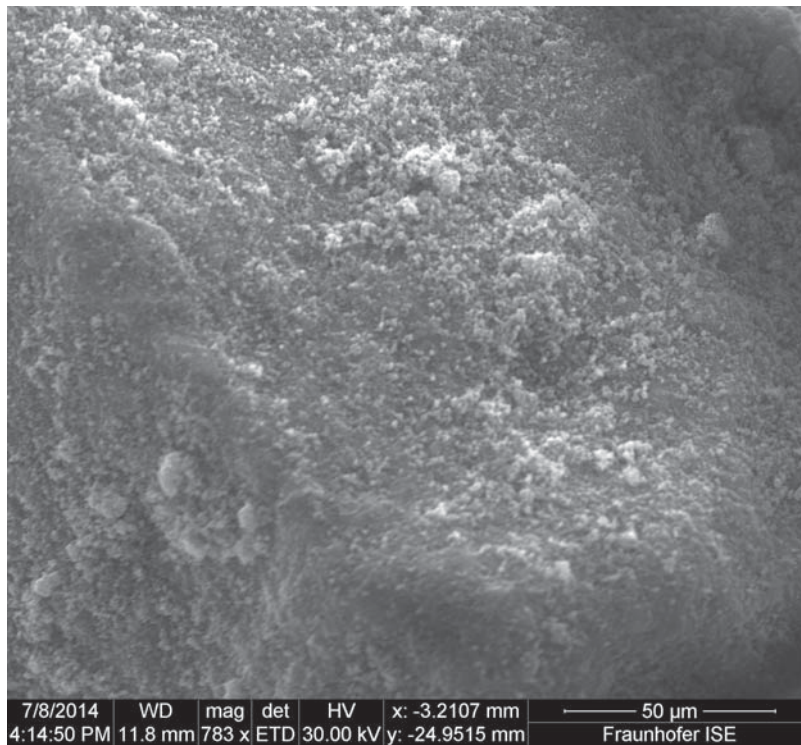

Figure S.8: SEM picture of the fresh TiO<sub>2</sub> catalyst. A fractured surface with very small coherent areas.
